# Supplementary material for: Large piezoelectricity in NaNbO3-based lead-free ceramicsviatuning oxygen octahedral tilt
Source: Royal Society of Chemistry journal article supplement (doi:10.1039/d1mh01680f), 2021-12-16
Supplement: d1mh01680f1.pdf [file d1mh01680f1.pdf]

## Supporting Information

### Large Piezoelectricity in $\text{NaNbO}_3$ -based Lead-free Ceramics via Tuning Oxygen Octahedral Tilt

Lu Wang, He Qi\*, Botao Gao, Ye Liu, Hui Liu and Jun Chen\*

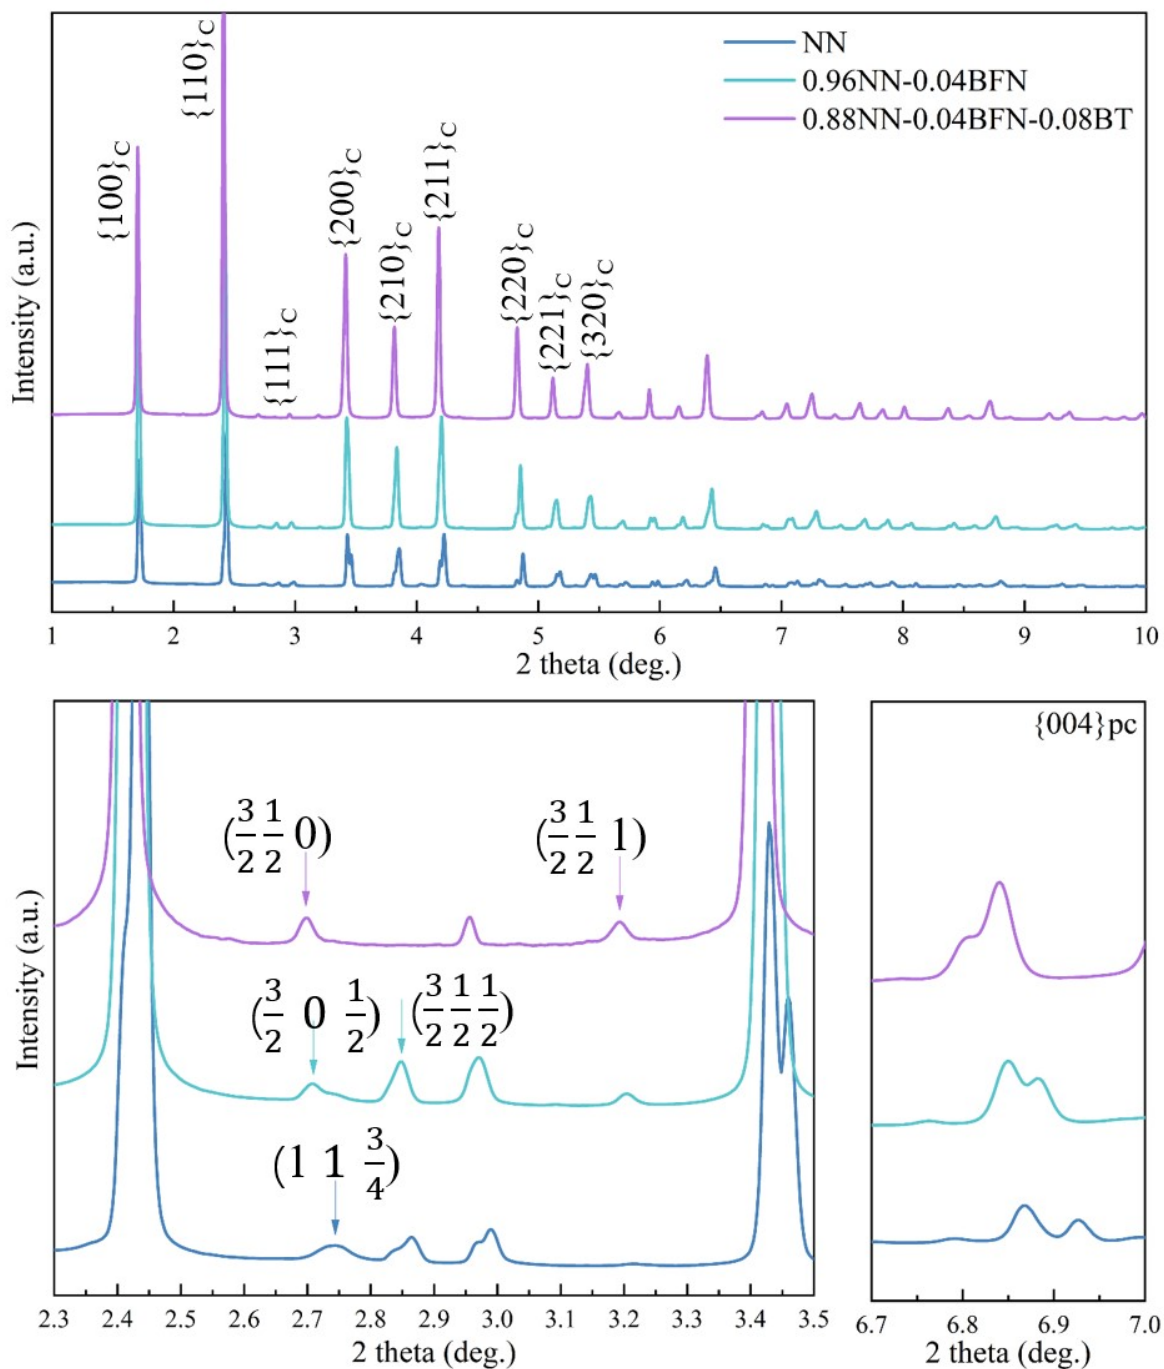

Figure S1. The composition dependence of SXRD patterns.

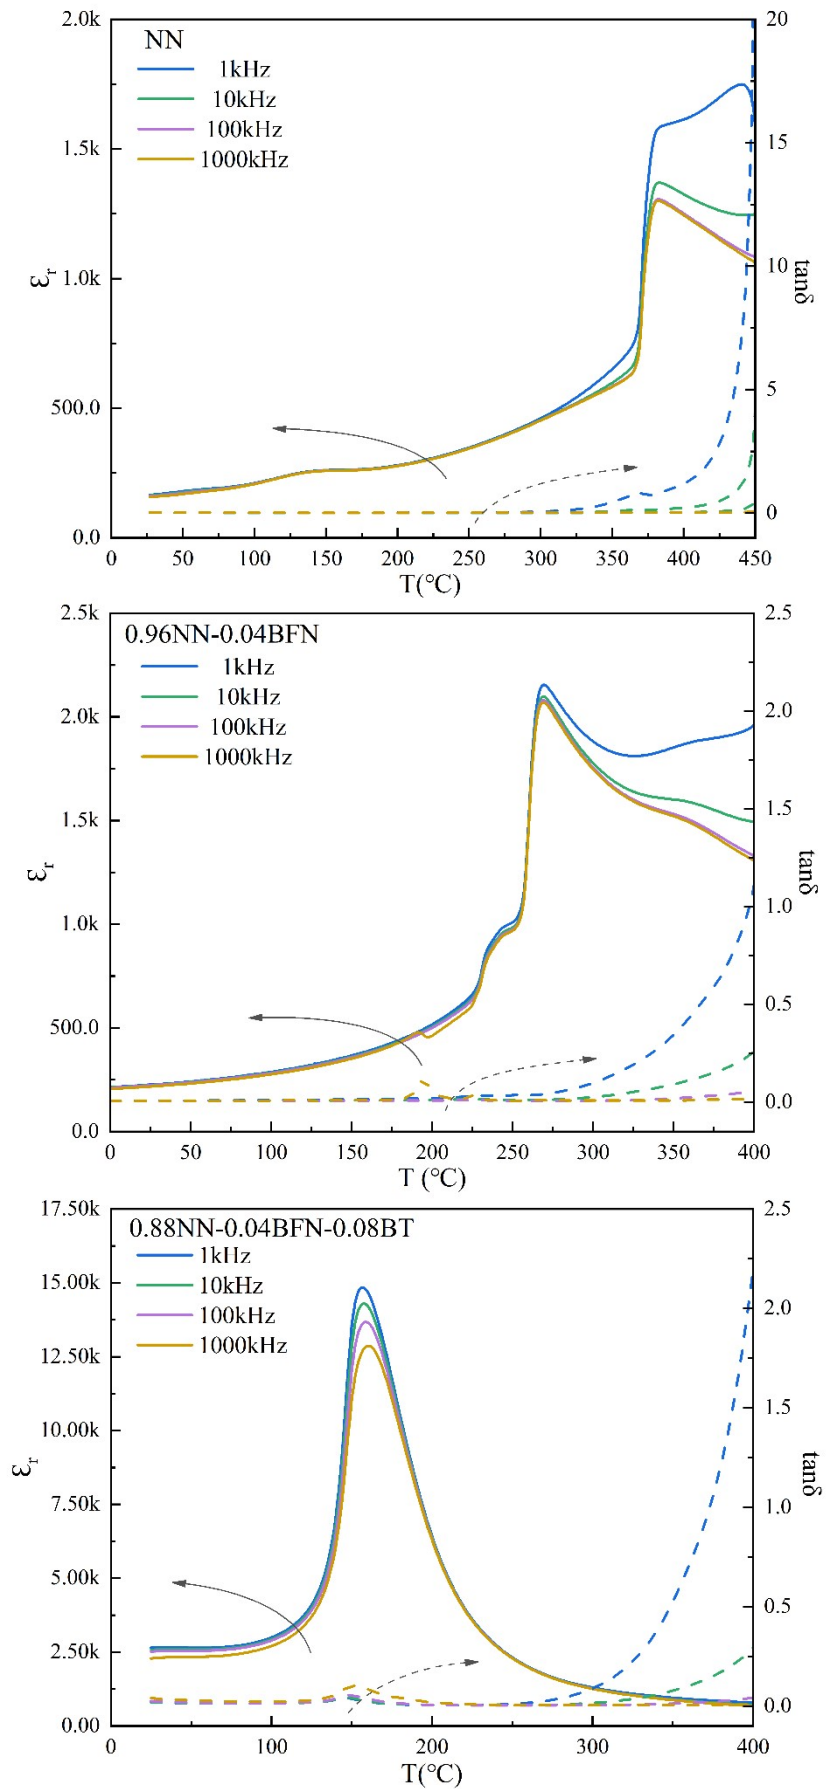

**Figure S2.** Dielectric permittivity and loss tangent with variable temperature and frequency at different compositions.

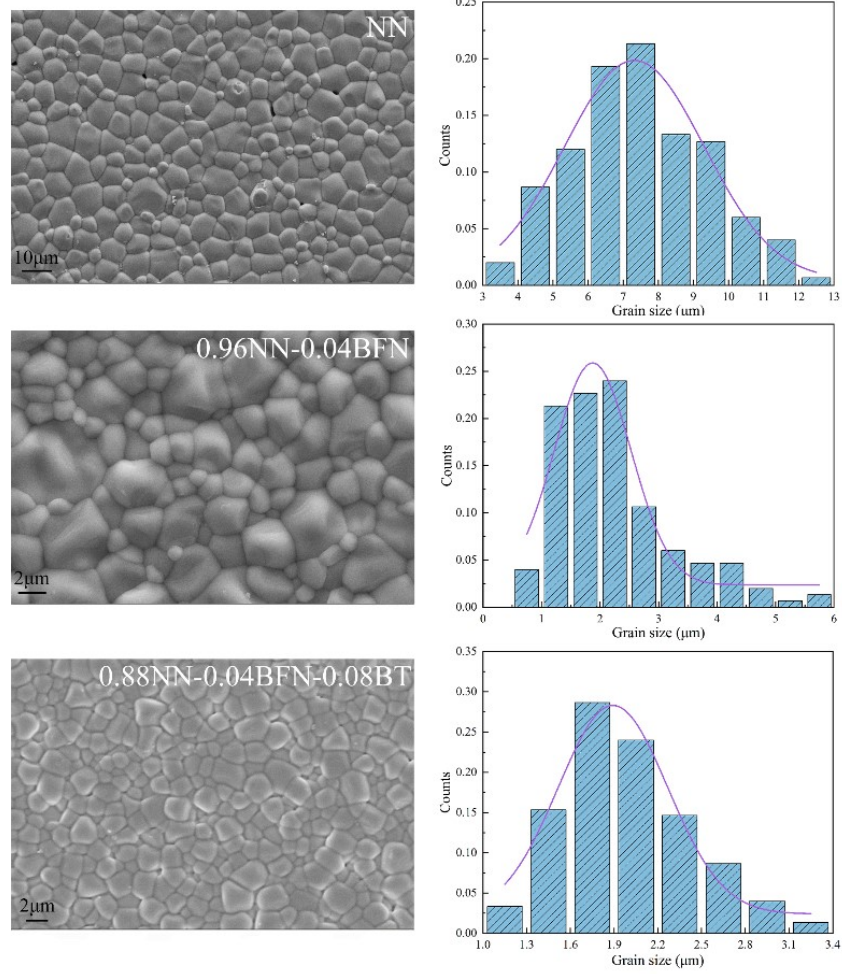

**Figure S3.** SEM micrograph of the as-sintered surface for NN, 0.96NN-0.04BFN, 0.88NN-0.04BFN-0.08BT and the grain size distribution at different compositions.

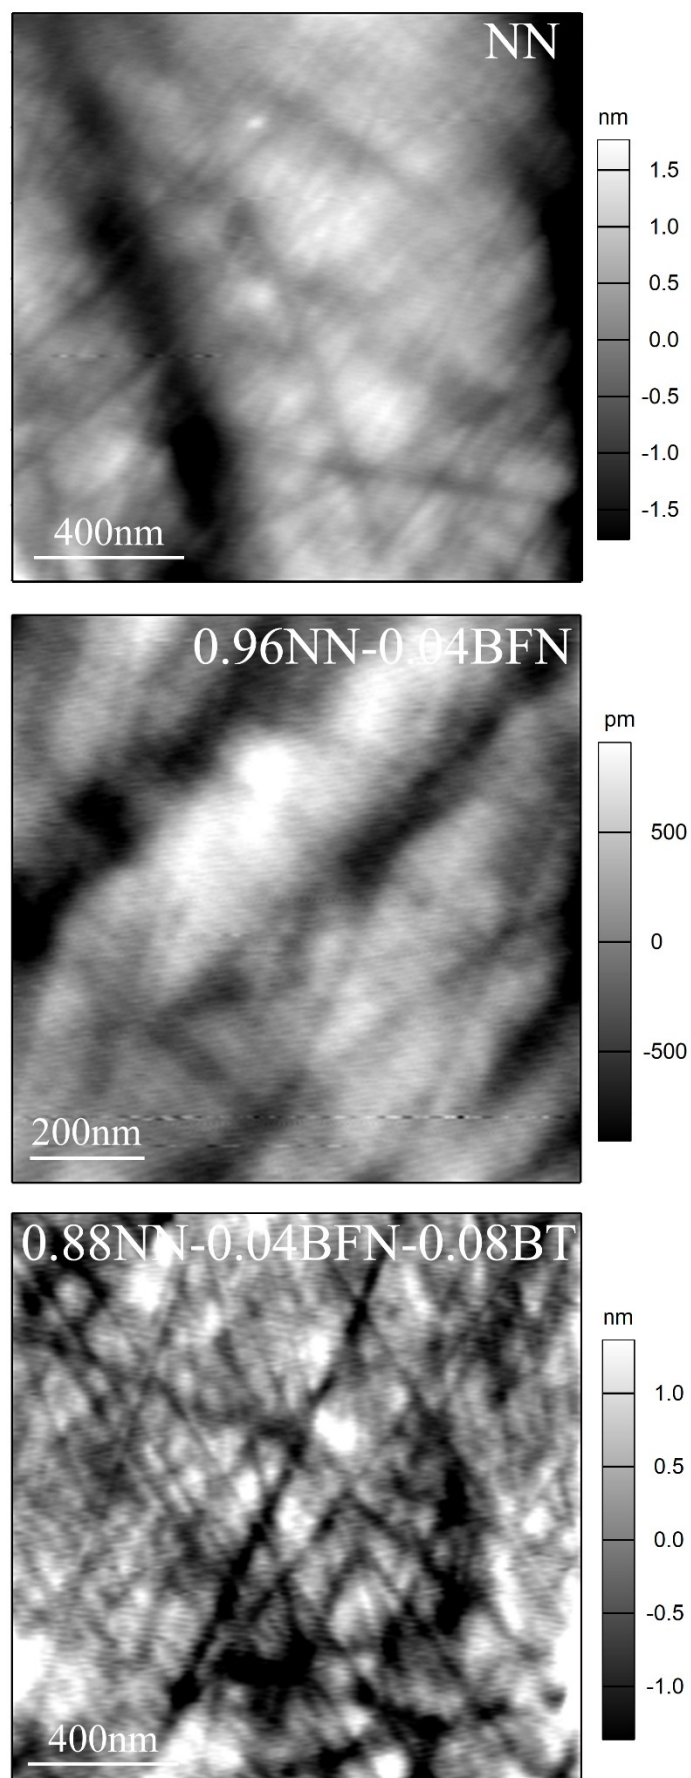

**Figure S4.** PFM surface topography with different compositions.

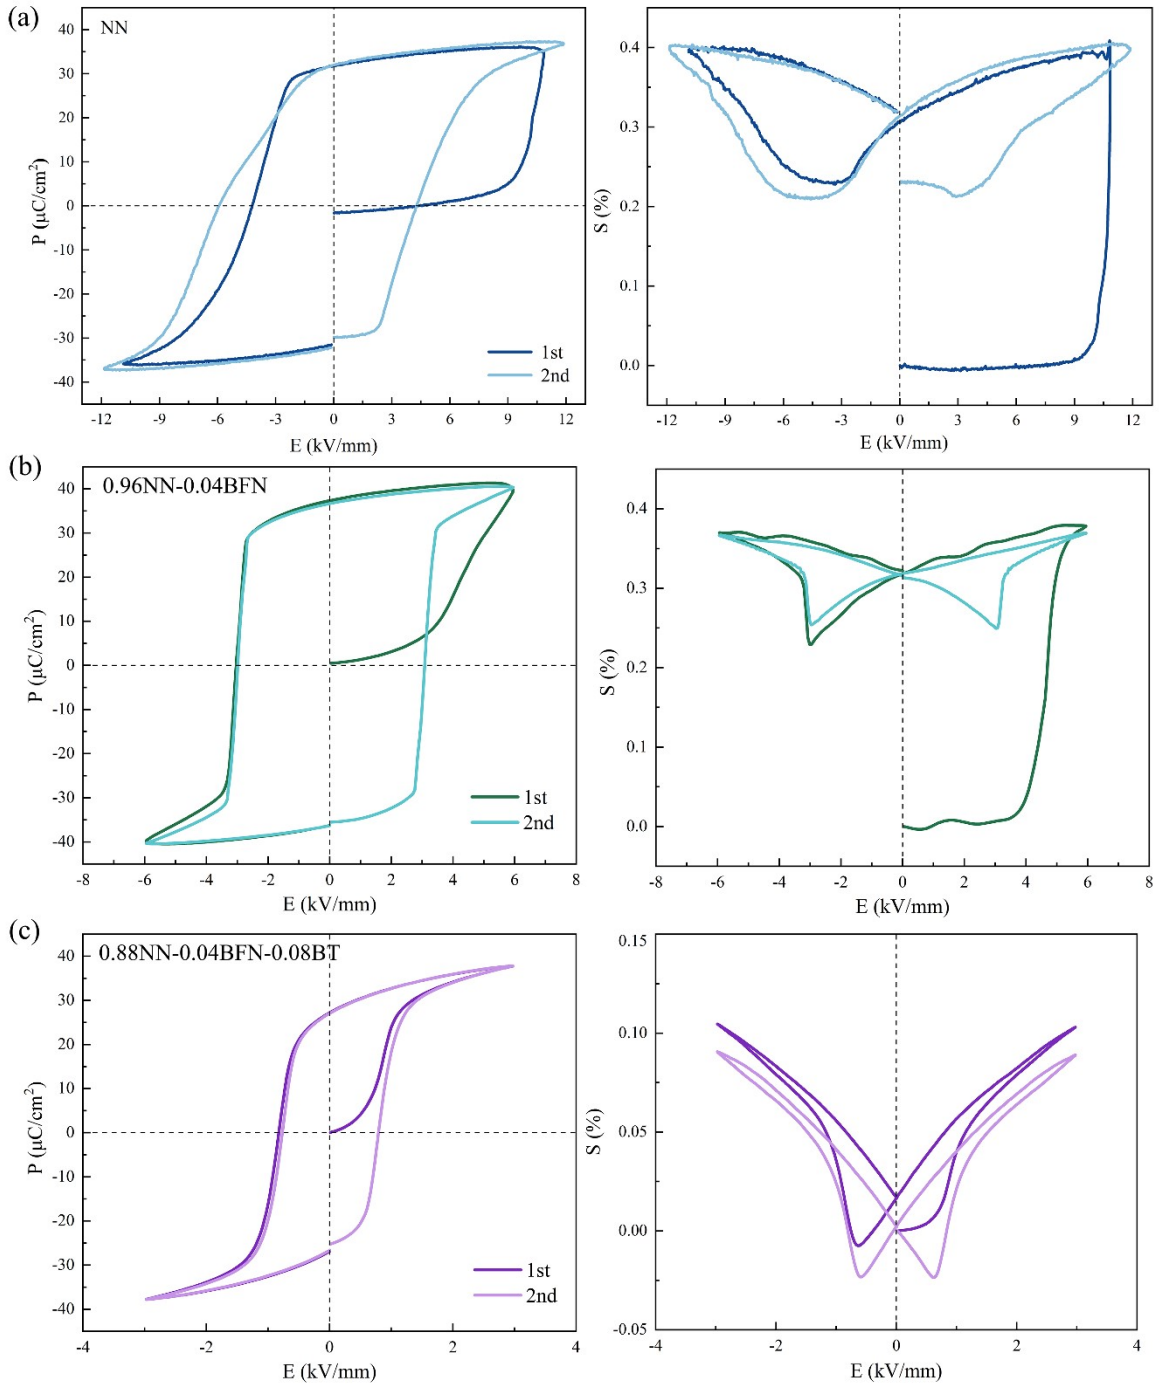

**Figure S5.** Polarization loops with first and second circle of unpoled ceramic disks for (a) NN, (b) 0.96NN-0.04BFN and (c) 0.88NN-0.04BFN-0.08BT and the corresponding bipolar strain curves.

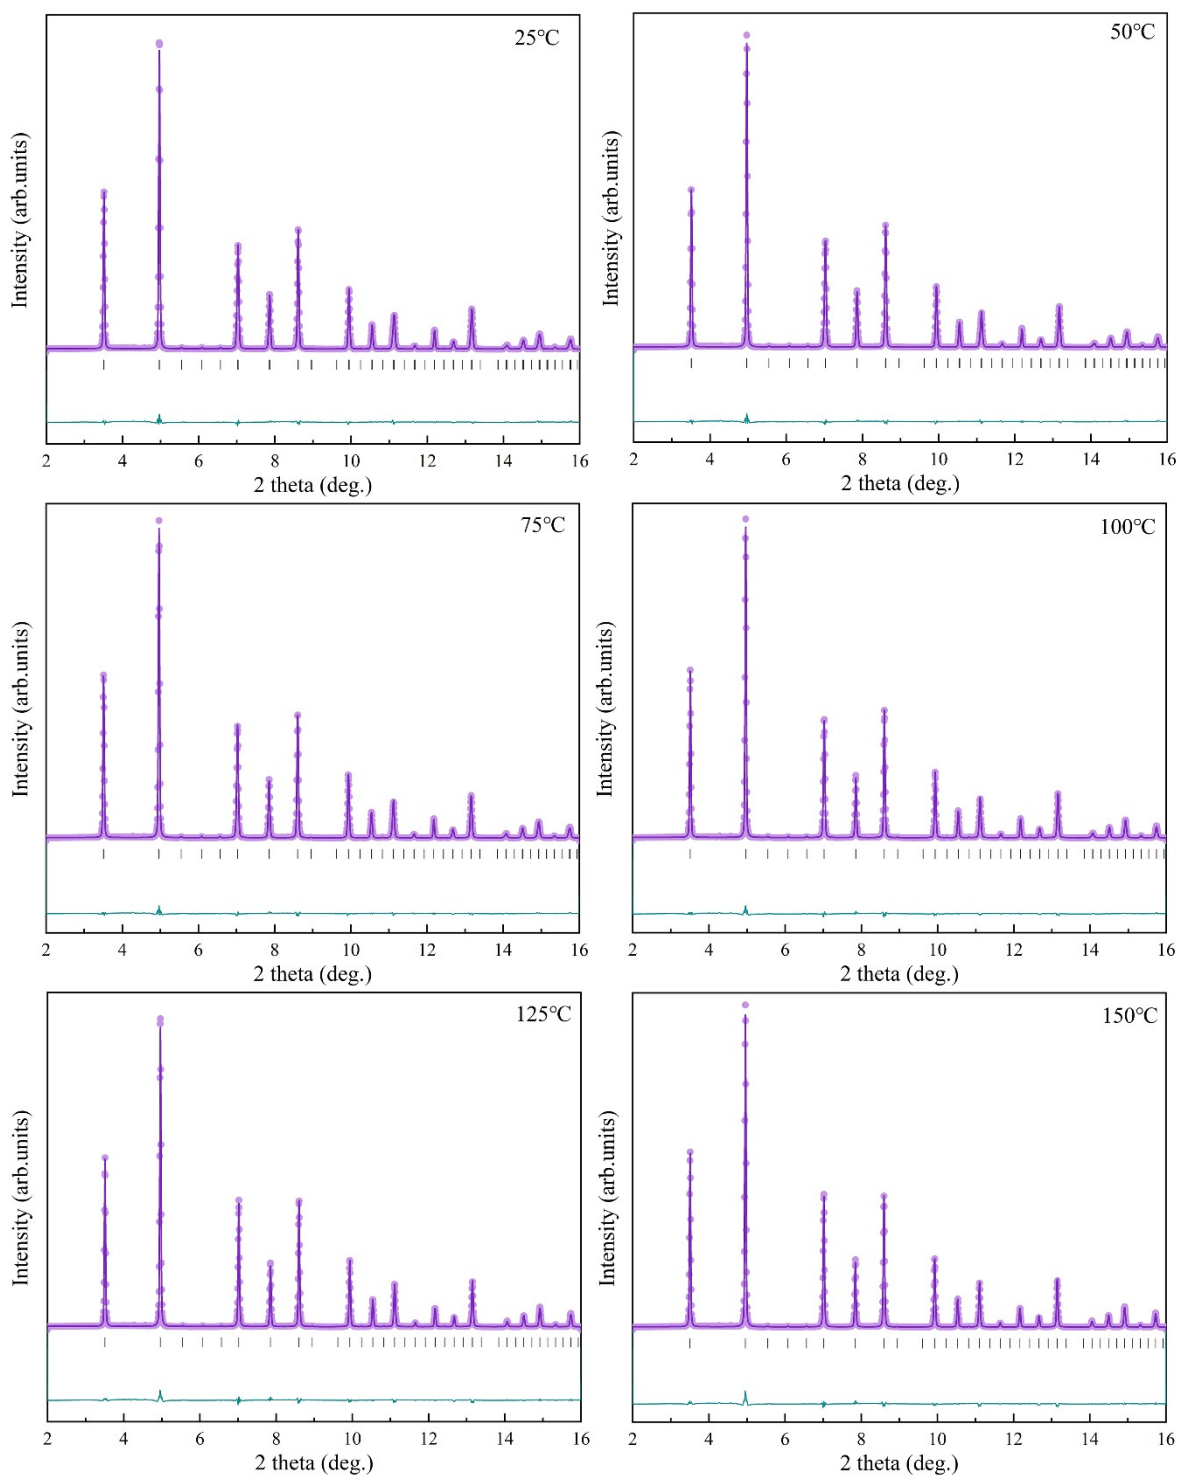

**Figure S6.** Structure refinement of temperature-dependent SXRD in 0.88NN-0.04BFN-0.08BT with increasing temperature (25°C-150°C).

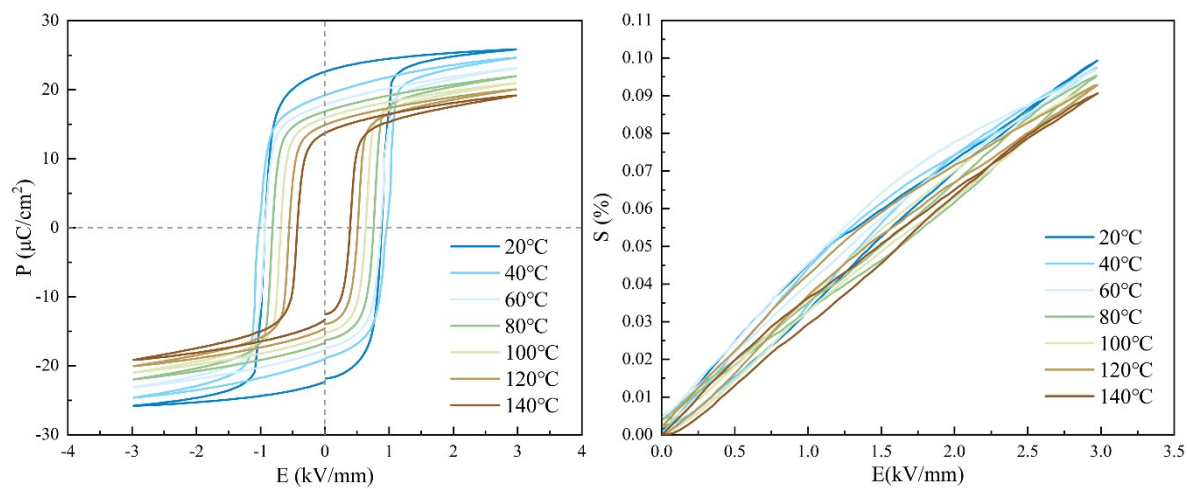

**Figure S7.** (a) temperature-dependent polarization loops and (b) unipolar strain of the 0.88NN-0.04BFN-0.08BT composition under  $3\text{ kV mm}^{-1}$  in the range of 20 - 140°C

**Table S1.** Detailed structural parameters for different compositions refined by the Rietveld method.

| NN                    |           |                       |           |                        |
|-----------------------|-----------|-----------------------|-----------|------------------------|
| Space group           |           | <i>Pbcm</i>           |           |                        |
| <i>a</i> = 5.504(1) Å |           | <i>b</i> = 5.568(9) Å |           | <i>c</i> = 15.519(4) Å |
| Atom                  | X         | Y                     | Z         | Occ                    |
| Na1                   | 0.2246(5) | 0.25                  | 0         | 0.5                    |
| Na2                   | 0.2219(7) | 0.2110(5)             | 0.25      | 0.5                    |
| Nb                    | 0.2521(1) | 0.7357(1)             | 0.1261(1) | 1                      |
| O1                    | 0.6845(4) | 0.25                  | 0         | 0.5                    |
| O2                    | 0.1769(2) | 0.7408(3)             | 0.25      | 0.5                    |
| O3                    | 0.4740(6) | 0.4670(4)             | 0.1420(2) | 1                      |
| O4                    | 0.0326(2) | 0.0334(0)             | 0.1118(2) | 1                      |

  

| 0.96NN-0.04BFN        |           |                         |           |                       |
|-----------------------|-----------|-------------------------|-----------|-----------------------|
| Space group           |           | <i>Pb2<sub>1</sub>m</i> |           |                       |
| <i>a</i> = 5.490(4) Å |           | <i>b</i> = 5.547(7) Å   |           | <i>c</i> = 7.824(7) Å |
| Atom                  | X         | Y                       | Z         | Occ                   |
| Na1                   | 0.7060(2) | 0.1950(1)               | 0.25      | 0.5                   |
| Na2                   | 0.7250(3) | 0.1960(5)               | 0.25      | 0.5                   |
| Nb                    | 0.2371(2) | 0.2100(1)               | 0         | 0.98                  |
| Fe                    | 0.2371(2) | 0.2100(1)               | 0.5       | 0.02                  |
| O1                    | 0.2900(1) | 0.2510(4)               | 0         | 0.5                   |
| O2                    | 0.1940(5) | 0.2370(3)               | 0.5       | 0.5                   |
| O3                    | 0.5288(6) | -0.0010(6)              | 0.2796(5) | 1                     |
| O4                    | 0.0190(4) | -0.0030(7)              | 0.2190(2) | 1                     |

  

| 0.88NN-0.04BFN-0.08BT            |           |             |                       |      |
|----------------------------------|-----------|-------------|-----------------------|------|
| Space group                      |           | <i>P4bm</i> |                       |      |
| <i>a</i> = <i>b</i> = 5.564(8) Å |           |             | <i>c</i> = 3.927(1) Å |      |
| Atom                             | X         | Y           | Z                     | Occ  |
| Na                               | 0         | 0.5         | 0.5023(2)             | 0.88 |
| Ba                               | 0         | 0.5         | 0.5023(2)             | 0.12 |
| Nb                               | 0         | 0           | 0                     | 0.90 |
| Fe                               | 0         | 0           | 0                     | 0.02 |
| Ti                               | 0         | 0           | 0                     | 0.08 |
| O1                               | 0.2749(7) | 0.2250(3)   | 0.0620(4)             | 2    |
| O2                               | 0         | 0           | 0.4497(2)             | 1    |



**Table S2.** Structural parameters change for tetragonal 0.88NN-0.04BFN-0.08BT with increasing temperature.

| $T$ (°C) | Space group |          | $P4bm$    |              |
|----------|-------------|----------|-----------|--------------|
|          | $a$ (Å)     | $c$ (Å)  | $c/a$     | $\omega$ (°) |
| 25       | 5.564(8)    | 3.927(1) | 1.002(13) | 5.71         |
| 50       | 5.565(6)    | 3.929(6) | 1.001(64) | 5.44         |
| 75       | 5.566(1)    | 3.932(4) | 1.001(01) | 5.145        |
| 100      | 5.566(7)    | 3.935(1) | 1.000(45) | 4.915        |
| 125      | 5.568(1)    | 3.937(1) | 1.000(21) | 4.55         |
| 150      | 5.570(4)    | 3.938(9) | 1.000(15) | 4.12         |
